# Supplementary material for: Hibiscus sabdariffa Meal Improves Iron Status of Childbearing Age Women and Prevents Stunting in Their Toddlers in Northern Ghana
Source: PubMed Central journal article supplement (PMC6357016; doi:10.3390/nu11010198), 2019-01-19
Supplement: nutrients-11-00198-s001.pdf [file nutrients-11-00198-s001.pdf]

Table S1: Nutrient composition of HSM and its ingredients

| Item                | Iron (mg/100mg) | Protein (mg/100mg) | Moisture (%) | Fat (mg/100gm) | Ash (%) |
|---------------------|-----------------|--------------------|--------------|----------------|---------|
| HSM (meal)          | 1.71            | 6.58               | 82.6         | 4.6            | 2.7     |
| Hibiscus Leaves     | 19.3            | -                  | -            | -              | -       |
| Dawadawa            | 8.43            | -                  | -            | -              | -       |
| Amani (dried fish)  | 22.91           | -                  | -            | -              | -       |
| Groundnut (pea nut) | 2.09            | -                  | -            | -              | -       |

HSM: Hibiscus Sabdariffa Leaves Meal. Dawadawa – Fermented African locust beans. Analysis done by Great Lakes Scientific, Inc. ([www.glslab.com](http://www.glslab.com)). Meal iron source/100mg: Hibiscus leaves: 0.63mg, Dawadawa: 0.27mg, Amani: 0.74mg, Groundnut: 0.07mg
